# Supplementary material for: A retrospective cohort study of Paxlovid efficacy depending on treatment time in hospitalized COVID-19 patients
Source: eLife. 2024 Apr 16;13:e89801. doi: 10.7554/eLife.89801 (PMC11078542; doi:10.7554/eLife.89801)
Supplement: Supplementary file 2. — The table provides population-wide fixed and random effects estimates for the viral dynamic parameters, whereas Supplementary file 1 provides the estimated median and variation across individuals for each parameter. The values assume that antiviral efficacy follows a logit-normal distribution and all other parameters follow log normal distributions*. Values in parentheses are relative standard errors (RSE) as a percent. [file elife-89801-supp2.docx]

##### **Supplementary File 2. Population-wide parameter estimates for the within-host model.** The table provides population-wide fixed and random effects estimates for the viral dynamic parameters, whereas Supplementary File 1 provides the estimated median and variation across individuals for each parameter. The values assume that antiviral efficacy follows a logit-normal distribution and all other parameters follow log normal distributions*. Values in parentheses are relative standard errors (RSE) as a percent.

| **Parameter** | **Fixed effect** | **Random effect SD** |
| --- | --- | --- |
| Cell infection ratein 10-9 mL/Copies in days-1 () | 17.26 (12) | 0.49 (29) |
| Rate in log10 for the interferon-induced conversion of target cells to refractory cells (Φ) | -9.37 (110) | 0.81 (17) |
| Rate in 10-3 at which refractory cells become target cells again (𝜌) | 5.24 (28) | 0.46 (86) |
| Infected cell clearance rate in days-1 () | 0.49 (5) | 0.61 (7) |
| Virus production rate inCopies/ mL in days-1 (𝜋) | 68.58 (10) | 0.38 (26) |
| Maximum antiviral efficacy () | 0.91 (1) | 0.32 (43) |

* The estimation model is of the form , where is the measured viral load of patient at time , is the actual viral load given viral dynamic parameters for patient , and is the residual term. For parameters following a log-normal distribution or logit-normal distribution, or , respectively, where are fixed effects and are random effects.
